# Supplementary material for: Identification of Complex Health Interventions Suitable for Evaluation: Development and Validation of the 8-Step Scoping Framework
Source: PubMed Central journal article supplement (PMC6423464; doi:10.2196/10075), 2019-03-05
Supplement: resprot_v8i3e10075_app1.pdf [file resprot_v8i3e10075_app1.pdf]

|                                                                                                                                                                                                                                                                                             |                                                                                                                                             |
|---------------------------------------------------------------------------------------------------------------------------------------------------------------------------------------------------------------------------------------------------------------------------------------------|---------------------------------------------------------------------------------------------------------------------------------------------|
| <b>Name of intervention</b>                                                                                                                                                                                                                                                                 |                                                                                                                                             |
| <b>Name of lead</b>                                                                                                                                                                                                                                                                         |                                                                                                                                             |
| <b>Brief description</b>                                                                                                                                                                                                                                                                    |                                                                                                                                             |
| <b>Target audience- please provide details</b><br>i.e. <ul style="list-style-type: none"> <li>• Pregnant women / partner</li> <li>• Family with child/ren</li> <li>• Age of child/ren</li> <li>• Parents of the future</li> <li>• Specific groups with specific characteristics?</li> </ul> |                                                                                                                                             |
| <b>Start date</b>                                                                                                                                                                                                                                                                           |                                                                                                                                             |
| <b>Did you collect any baseline data before starting the programme/intervention?</b>                                                                                                                                                                                                        |                                                                                                                                             |
| <b>Length of intervention?</b><br><br><i>Is this a pilot?</i>                                                                                                                                                                                                                               |                                                                                                                                             |
| <b>What are the key aims of the intervention?</b>                                                                                                                                                                                                                                           |                                                                                                                                             |
| <b>The intervention links with which Flying Start overarching outcomes?</b>                                                                                                                                                                                                                 | Communication and language<br>Healthy pregnancy and nutrition and diet<br>Social and emotional<br>Systems including workforce, volunteering |
| <b>What data is available to demonstrate impact? Routine data, validated tools,</b>                                                                                                                                                                                                         |                                                                                                                                             |

| <b>process data?</b>                                                                                   |                                                           |                                                                                              |                                  |                                      |
|--------------------------------------------------------------------------------------------------------|-----------------------------------------------------------|----------------------------------------------------------------------------------------------|----------------------------------|--------------------------------------|
|                                                                                                        | <b>What data is available and what does this tell us?</b> | <b>Who owns the data? Please state if in public domain or locally held data intelligence</b> | <b>How often is it reported?</b> | <b>Who is custodian of the data?</b> |
| <b>Key KPI's short term</b>                                                                            |                                                           |                                                                                              |                                  |                                      |
| <b>Key KPI's medium term</b>                                                                           |                                                           |                                                                                              |                                  |                                      |
| <b>Key KPI's longer term</b>                                                                           |                                                           |                                                                                              |                                  |                                      |
| <b>What opportunities are there for tracking cohorts?</b><br><br><i>What tools would be needed?</i>    |                                                           |                                                                                              |                                  |                                      |
| <b>Would interviews/ focus groups/ observations be possible as part of evaluation of intervention?</b> |                                                           |                                                                                              |                                  |                                      |
| <b>How long would you estimate before we can expect to see</b>                                         |                                                           |                                                                                              |                                  |                                      |

|                                                                                                                                                         |  |
|---------------------------------------------------------------------------------------------------------------------------------------------------------|--|
| <b>change?</b>                                                                                                                                          |  |
| <b>What is the size and scale of the intervention – how many people with the intervention be working with?</b>                                          |  |
| <b>What is the coverage of intervention?</b> <ul style="list-style-type: none"><li>• town wide</li><li>• Ward focused?<br/>If so which ward/s</li></ul> |  |
| <b>Are participants likely to be involved in more than one programme? If so, please describe</b>                                                        |  |
| <b>Other comments</b>                                                                                                                                   |  |
